# Supplementary figures and images for: Identification of genomic regions associated with inbreeding depression in Holstein and Jersey dairy cattle
Source: Springer Nature journal article supplement (doi:10.1186/s12711-014-0071-7), 2014-11-17

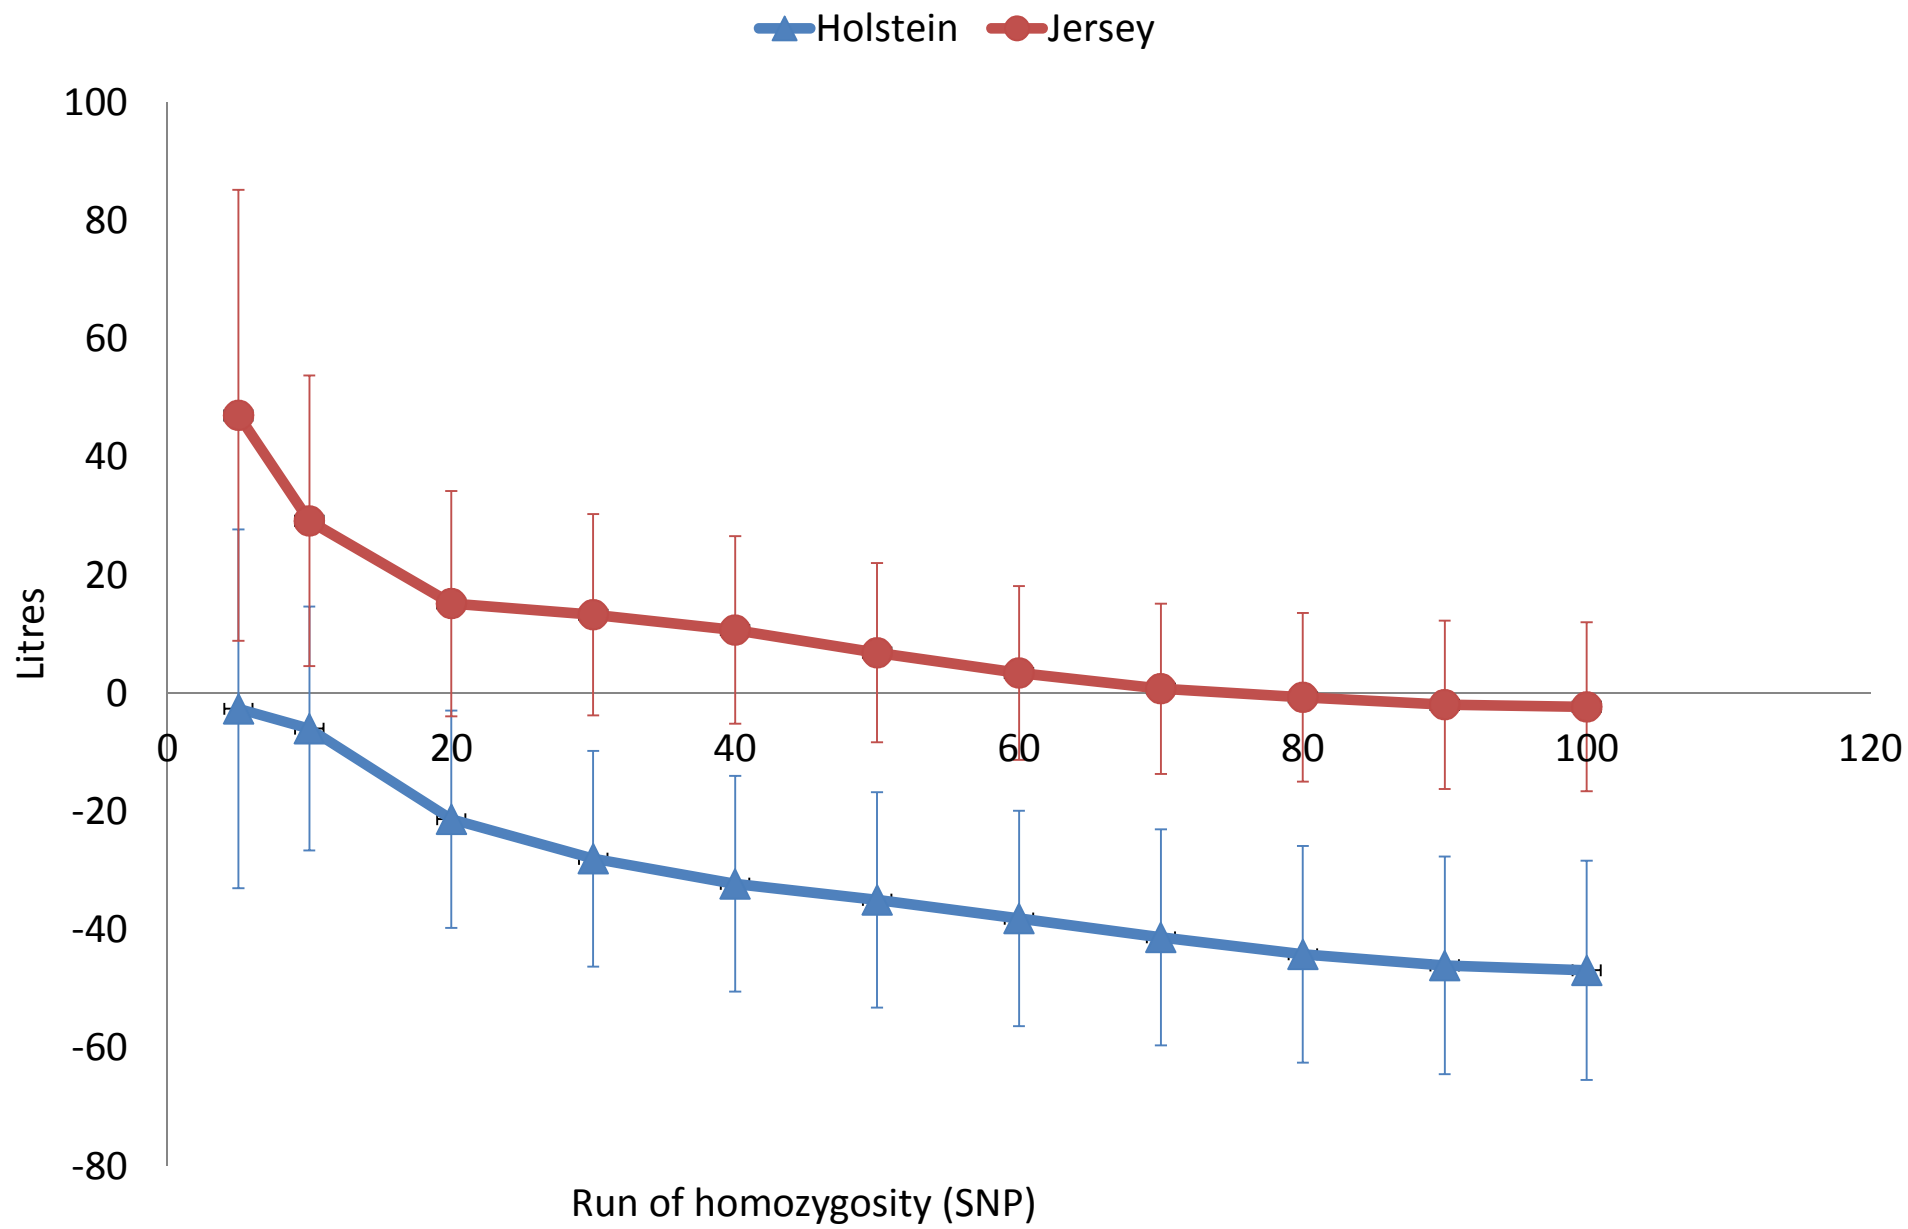

Supplement: MOESM7 [file 12711_2014_71_MOESM7_ESM.pdf]
